# Supplementary material
Source: PubMed Central journal article supplement (PMC7537108)

**A**

OVCA433

- ▼ WntC59 (IC<sub>50</sub>=48nM)
- ▲ Pyr. Pam. (IC<sub>50</sub>=0.9537nM)
- PRI724 (IC<sub>50</sub>=1224nM)

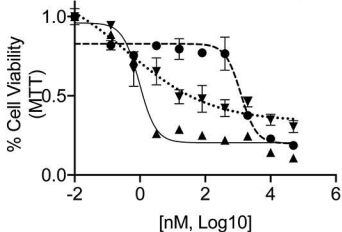

OVCA433-OR

- WntC59 (IC<sub>50</sub>>50 uM)
- ▲ Pyr. Pam. (IC<sub>50</sub>=1.312nM)
- ▼ PRI724 (IC<sub>50</sub>=528.7nM)

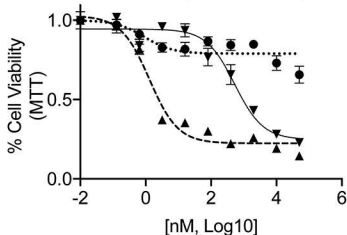

**B**

PEO1

- Wnt-C59 (IC<sub>50</sub>>50μM)
- ▲ Pyr Pam (IC<sub>50</sub> = 142.5nM)
- ▼ PRI724 (IC<sub>50</sub> = 1366nM)

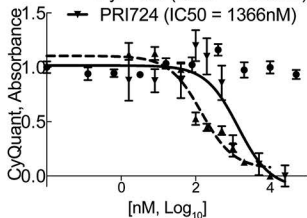

PEO1

- WntC59 (IC<sub>50</sub> = 25μM)
- ▲ Pyr Pam (IC<sub>50</sub> = 162.5 nM)
- ▼ PRI724 (IC<sub>50</sub> = 4195 nM)

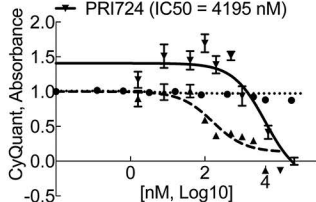

**C**

OVCA433

- ▼ WntC59 (IC<sub>50</sub>=612.3nM)
- Pyr. Pam. (IC<sub>50</sub>=6.614nM)
- ▲ PRI724 (IC<sub>50</sub>>50nM)

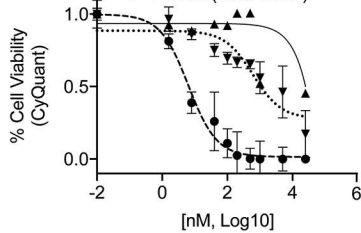

OVCA433-OR

- WntC59 (IC<sub>50</sub>=1220nM)
- ▼ Pyr. Pam. (IC<sub>50</sub>=7.564nM)
- ▲ PRI724 (IC<sub>50</sub>=1360nM)

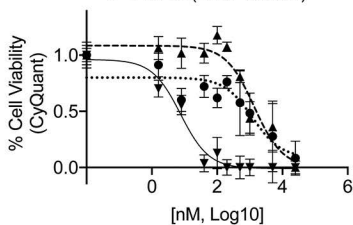

Supplement: NIHMS1629674-supplement-Figure_S3.pdf [file NIHMS1629674-supplement-Figure_S3.pdf]
