# Supplementary material
Source: PubMed Central journal article supplement (PMC7537108)
Supplement: NIHMS1629674-supplement-Sup_Table_2.pdf [file NIHMS1629674-supplement-Sup_Table_2.pdf]

Sup. Table 2

| <b>PRIMERS</b> | <b>SEQUENCE</b>            |
|----------------|----------------------------|
| FOSL1 forward  | CTTGTGAACAGATCAGCCCGGA     |
| FOSL1 reverse  | GTCGGTCAGTTCCTTCCTCC       |
| CCND1 forward  | GATCAAGTGTGACCCGGACTG      |
| CCND1 reverse  | CCTTGGGGTCCATGTTCTGC       |
| WNT3A forward  | ATGGTGTCTCGGGAGTT          |
| WNT3A reverse  | TGGCACTTGCACTTGAG          |
| WNT5A forward  | CATGAACCTGCACAACAACGA      |
| WNT5A reverse  | GGCACTTGCAAGGCCACAT        |
| WNT7B forward  | TCATGCACAGAACTTTCGCA       |
| WNT7B reverse  | GATGACAGTGCTCCGAGCTTC      |
| SFRP1 forward  | GAGACTTCTGTTCCCTGGGGGCCGAG |
| SFRP1 reverse  | CCCGATGCCCATGCCGGCTCT      |
| GAPDH forward  | GTCTCCTCTGACTTCAACAGCG     |
| GAPDH reverse  | ACCACCCTGTTGCTGTAGCCAA     |
| 18S forward    | AACTTTCGATGGTAGTCGCCG      |
| 18S reverse    | CCTTGGATGTGGTAGCCGTTT      |
| B2M forward    | GGCATTCCCTGAAGCTGACA       |
| B2M reverse    | CTTCAATGTCGGATGGATGAAAC    |
