# Supplementary material
Source: PubMed Central journal article supplement (PMC7537108)

A

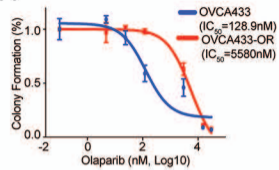

B

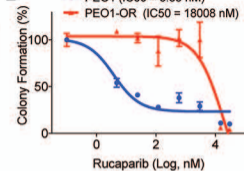

C

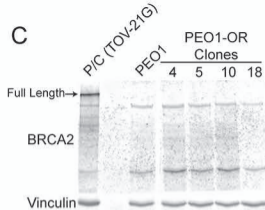

D

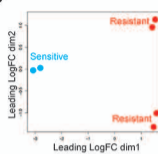

E

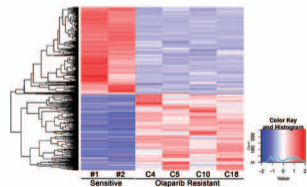

F

TOP/FOP Luciferase assay

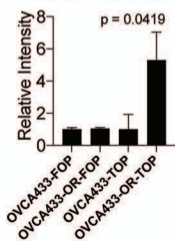

G

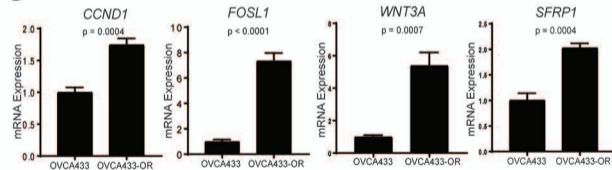

Supplement: NIHMS1629674-supplement-Figure_S1.pdf [file NIHMS1629674-supplement-Figure_S1.pdf]

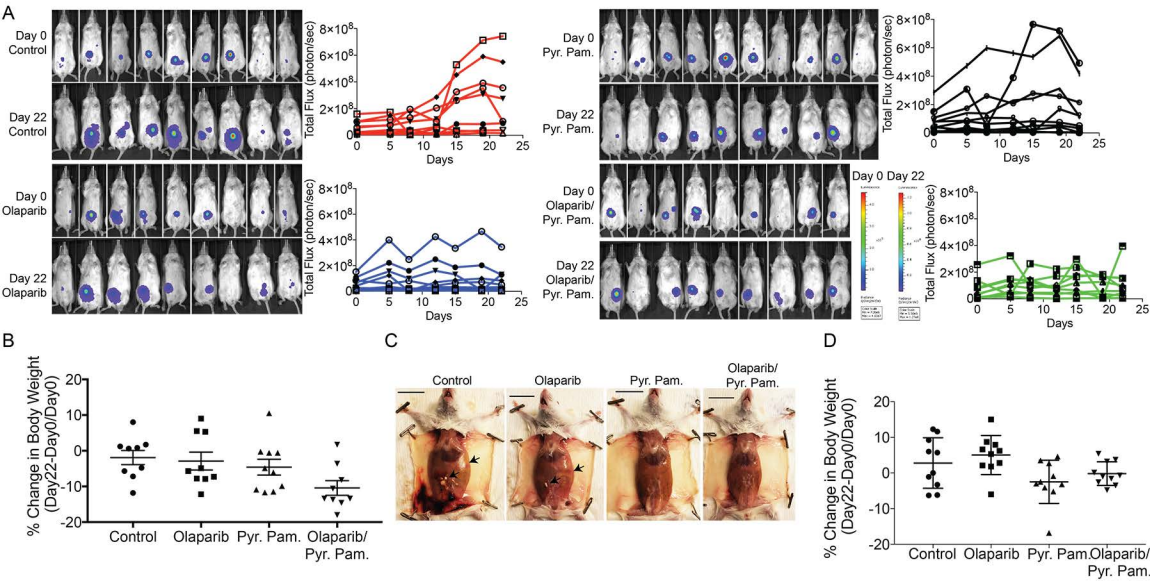

Supplement: NIHMS1629674-supplement-Figure_S5.pdf [file NIHMS1629674-supplement-Figure_S5.pdf]
